# Supplementary material for: Plant Oil-Based Acrylic Latexes towards Multisubstrate Bonding Adhesives Applications
Source: MDPI journal article supplement (doi:10.3390/molecules27165170), 2022-08-13
Supplement: s1 [file s1]

## Supporting Information

### Plant Oil-based Acrylic Latexes Suitable for Multisubstrate Bonding Adhesives Applications

Vasylyna Kirianchuk,<sup>1</sup> Bohdan Domnich,<sup>2</sup> Zoriana Demchuk,<sup>3</sup> Iryna Bon,<sup>2</sup> Svitlana Trotsenko,<sup>2</sup> Oleh Shevchuk,<sup>1</sup> Ghasideh Pourhashem,<sup>2</sup> Andriy Voronov<sup>2\*</sup>

<sup>1</sup> *Department of Organic Chemistry, Institute of Chemistry and Chemical Technologies, Lviv Polytechnic National University, Lviv, Ukraine, 79013*

<sup>2</sup> *Department of Coatings and Polymeric Materials, North Dakota State University, Fargo, ND, United States, 58102*

<sup>3</sup> *Chemical Sciences Division, Oak Ridge National Laboratory, Oak Ridge, TN, United States, 37830*

\*Corresponding author. E-mail address: andriy.voronov@ndsu.edu

3 pages, 4 Figures

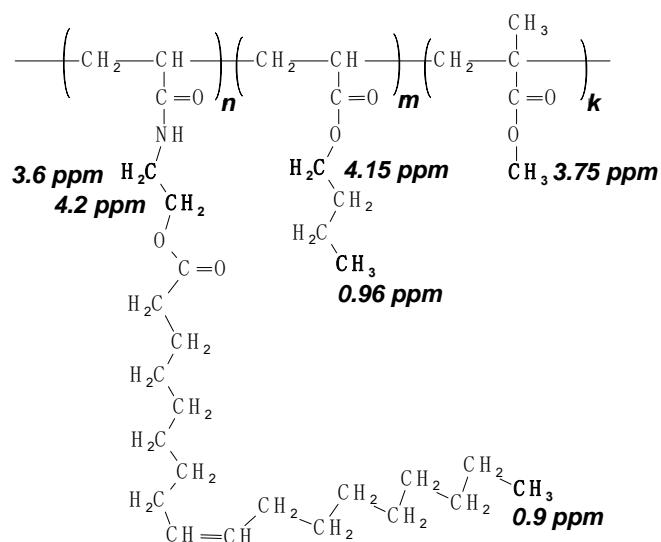

**Figure S1.** Chemical structure of plant oil-based terpolymer HOSBM-BA-MMA with indicated integral proton shifts

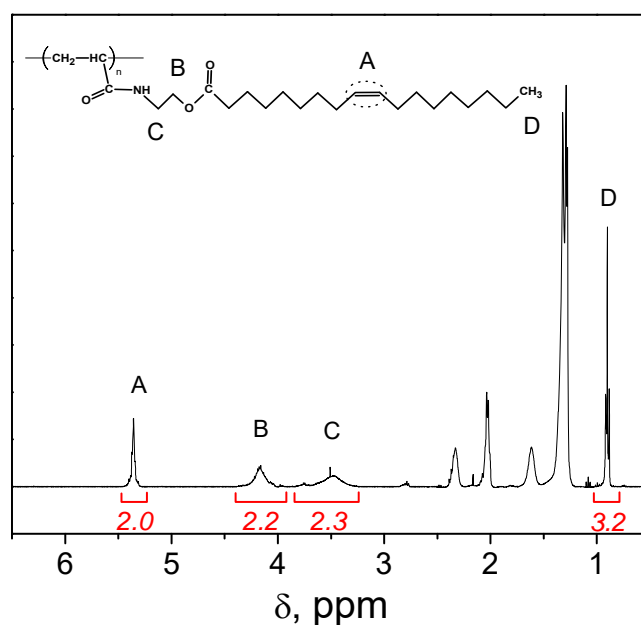

**Figure S2.** <sup>1</sup>H NMR spectrum of poly(HOSBM)

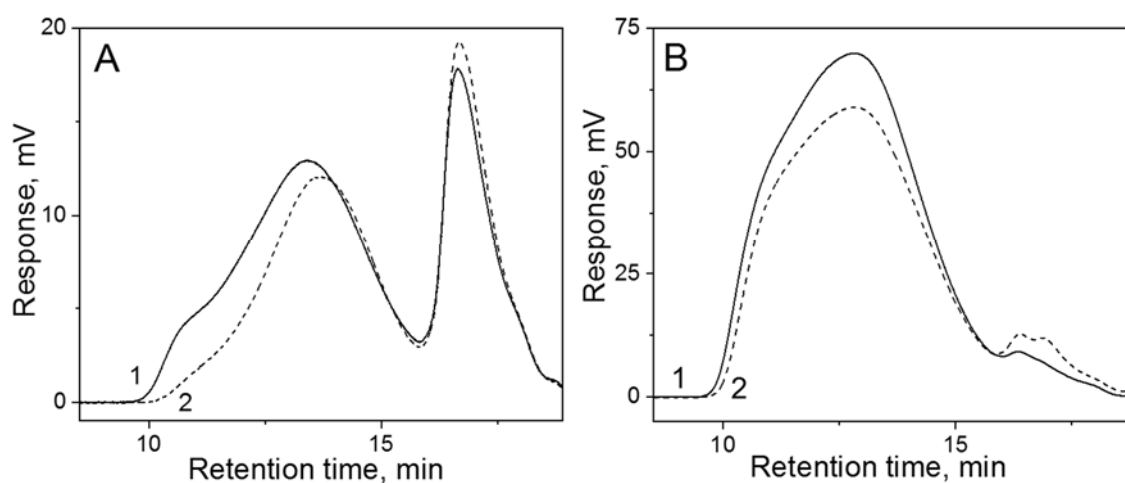

**Figure S3.** Gel permeation chromatography (GPC) analysis diagram of terpolymers HOSBM-BA-MMA (A) and HOSBM-BA-St (B)

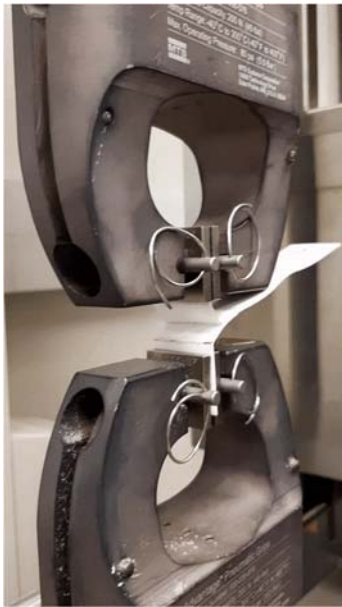

**A**

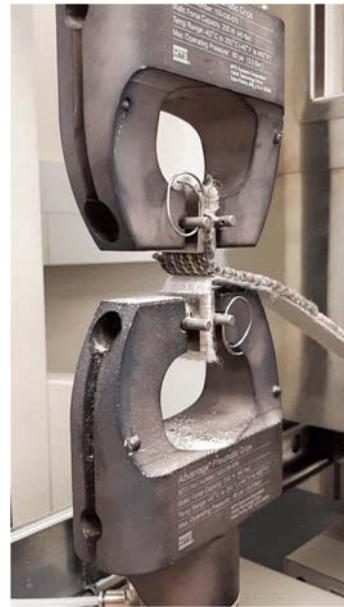

**B**

**Figure S4.** T-peel adhesion strength testing on paperboard (A) and PP-PET (B) substrates after applying plant oil-based terpolymers
